# Supplementary material for: Hierarchical hollow tubular fibrous brucite-templated carbons obtained by KOH activation for supercapacitors
Source: Royal Society of Chemistry journal article supplement (doi:10.1039/d2ra07454k), 2023-01-01
Supplement: d2ra07454k1.pdf [file d2ra07454k1.pdf]

Support Information

**Hierarchical Hollow Tubular Fibrous Brucite-Templated Carbons Obtained by KOH Activation for Supercapacitor**

Fangfang Liu<sup>1,2</sup>, Xiuyun Chuan<sup>1\*</sup>, Yupeng Zhao<sup>1</sup>

1. School of Earth and Space Sciences, Peking University, Beijing 100871, China

2. School of Materials and Physics, China University of Mining and Technology, Xuzhou 221009, China

\*Corresponding author: xychuan@pku.edu.cn

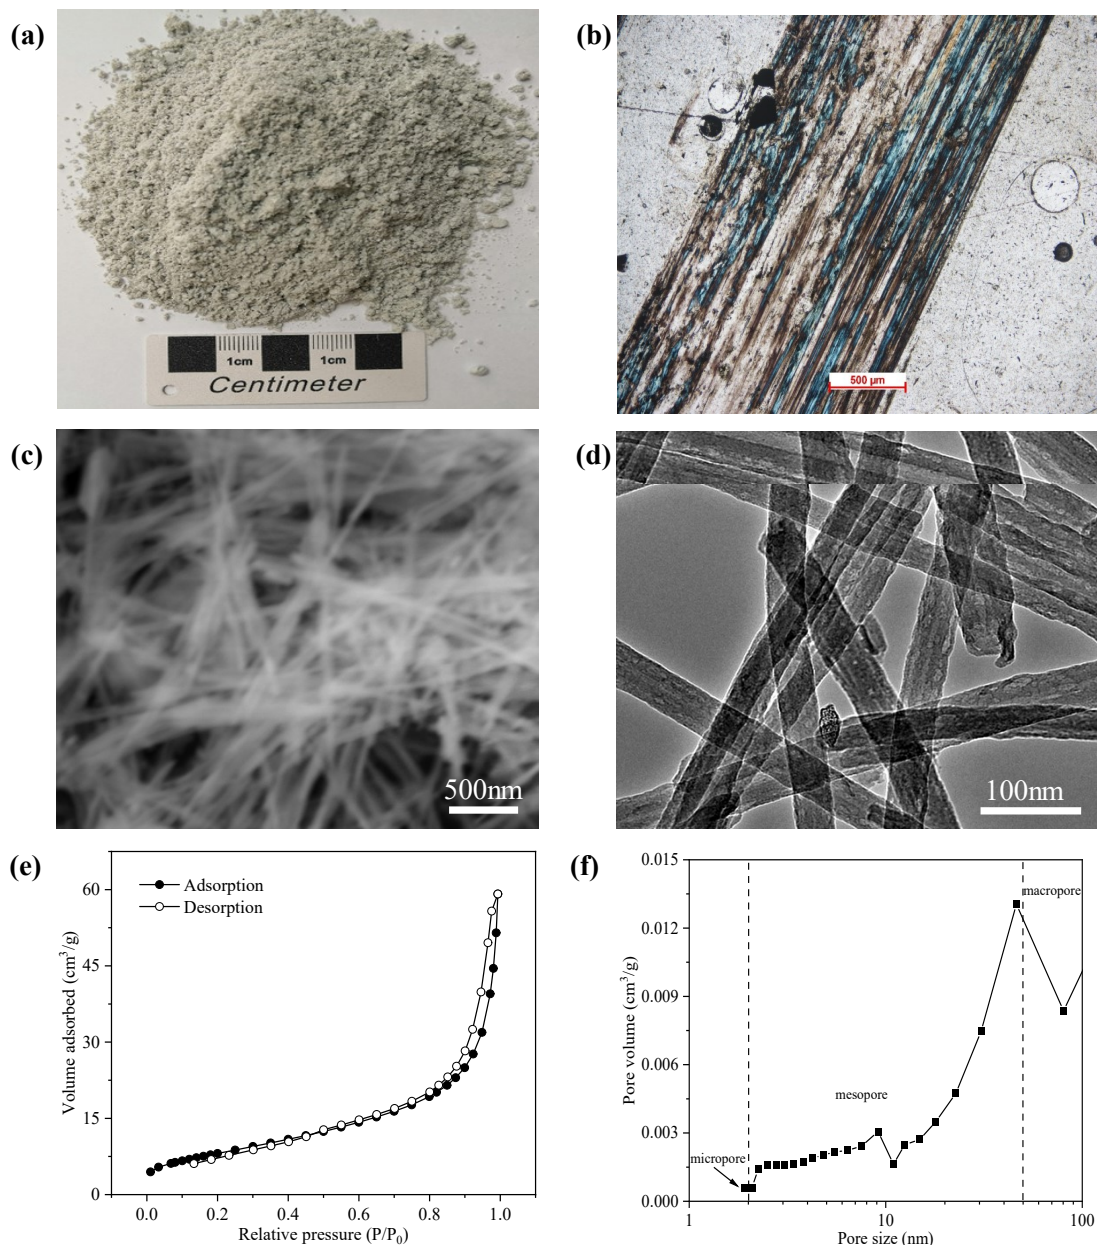

**Fig. S1** Mineralogical characteristics analysis of fibrous brucite used in experiments. (a) Fibrous brucite powder. (b) Photomineralogical features under cross-polarized. (c) SEM. (d) TEM micrograph. (e) N<sub>2</sub> adsorption-desorption isotherms and (f) DFT pore size distribution.

Table S1 Specific surface areas and pore texture of fibrous brucite

| Sample | $D_{ap}$<br>(nm) | $S_{Total}$<br>( $m^2/g$ ) | $V_{Total}$<br>( $cm^3/g$ ) | $V_{micro}$<br>( $cm^3/g$ ) | $V_{meso}$<br>( $cm^3/g$ ) |
|--------|------------------|----------------------------|-----------------------------|-----------------------------|----------------------------|
| FB     | 8.2              | 33                         | 0.09                        | 0.001                       | 0.06                       |

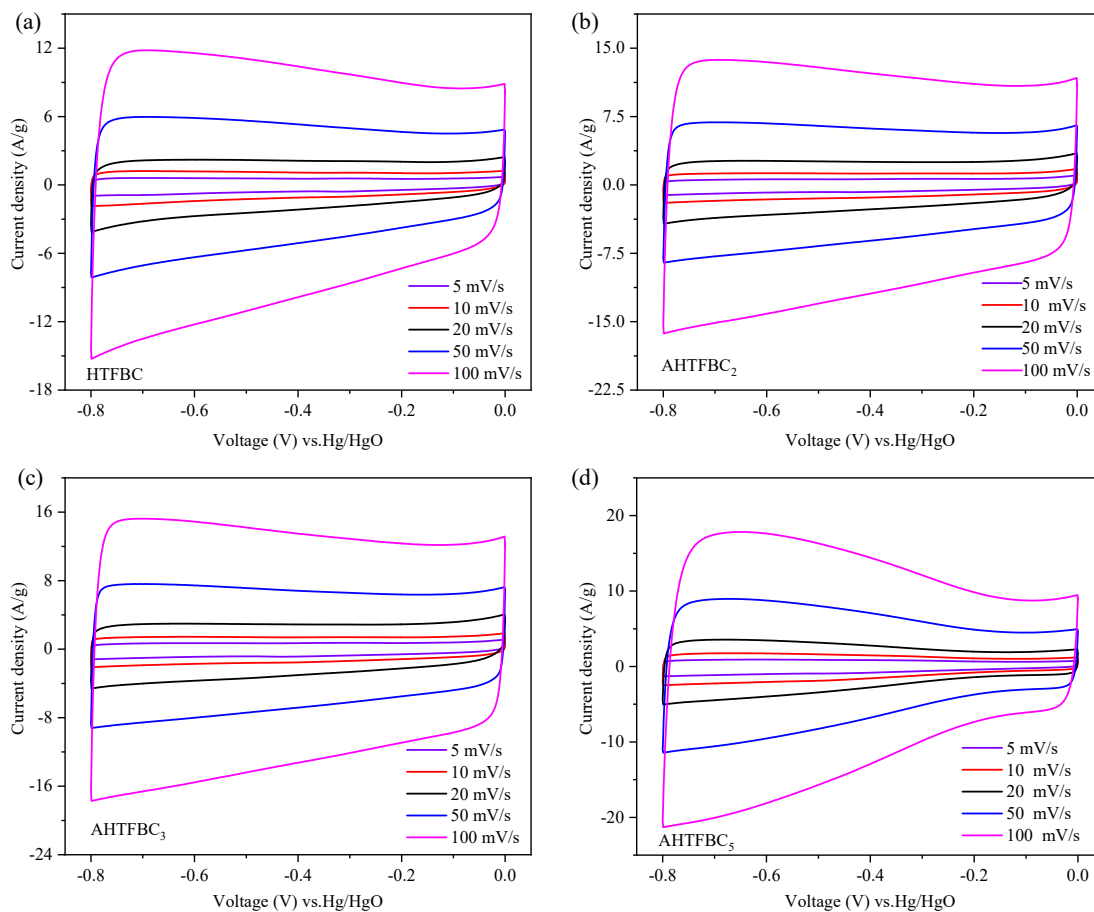

**Fig. S2** CV curves of the HTFBC and AHTFBCs measured in a three-electrode system in the 6 M KOH electrolyte. (a) HTFBC; (b) AHTFBC<sub>2</sub>; (c) AHTFBC<sub>3</sub>; (d) AHTFBC<sub>5</sub>

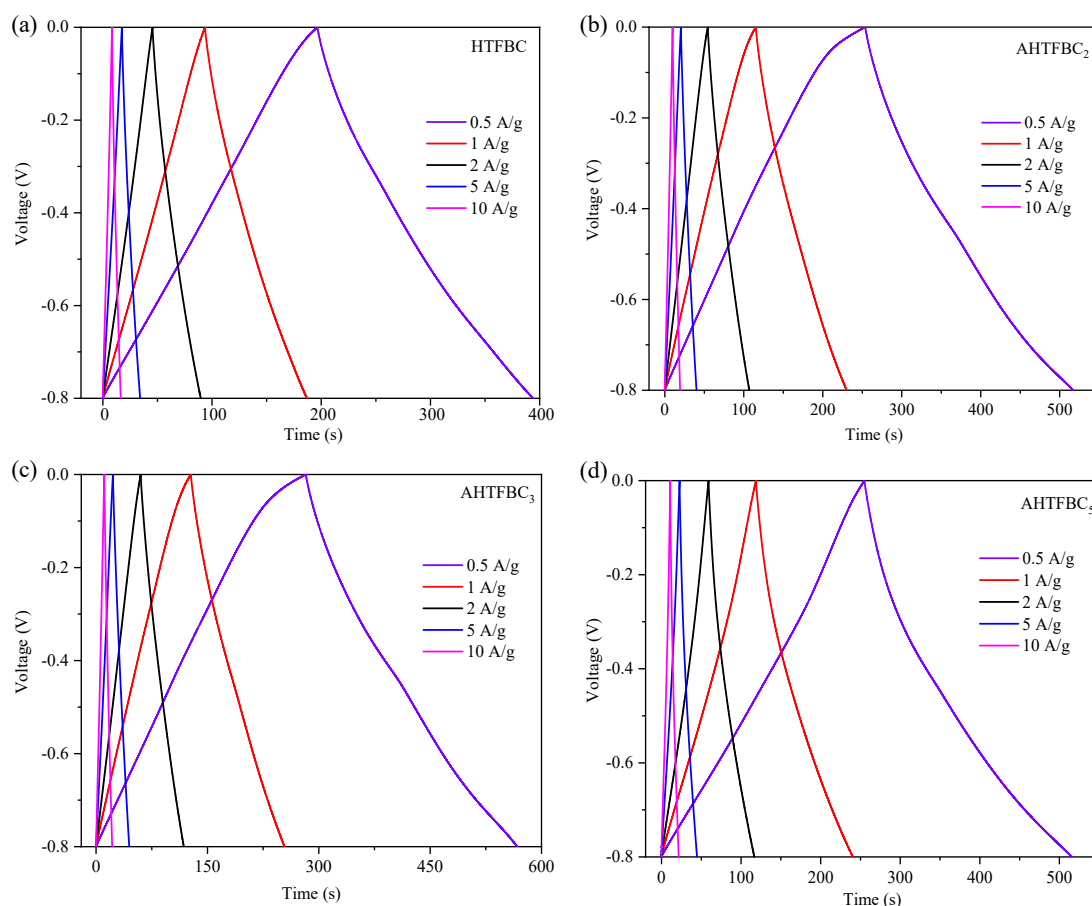

**Fig. S3** GCD curves of the HTFBC and AHTFBCs measured in a three-electrode system in the 6 M KOH electrolyte. (a) HTFBC; (b) AHTFBC<sub>2</sub>; (c) AHTFBC<sub>3</sub>; (d) AHTFBC<sub>5</sub>

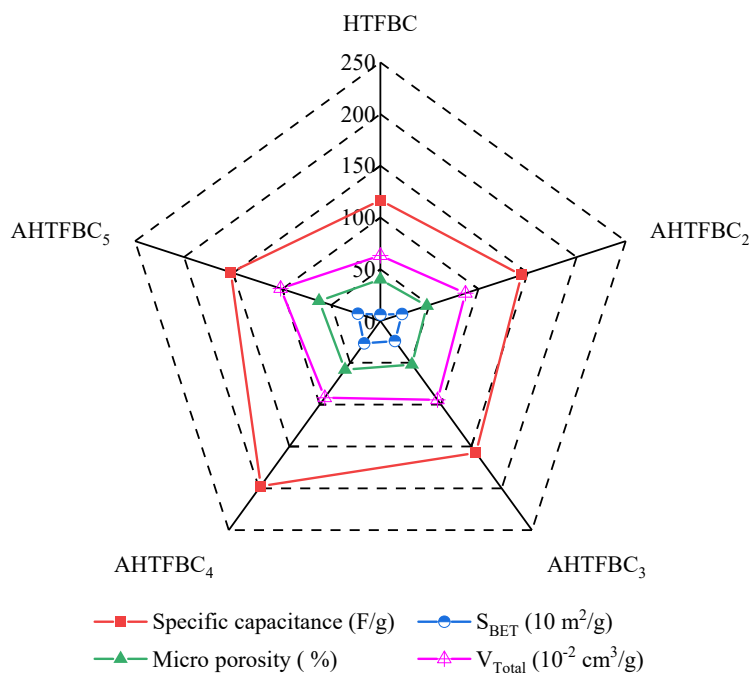

**Fig. S4** The cobweb map of specific capacitance, specific surface area, pore volume and micro porosity of HTFBC and AHTFBCs

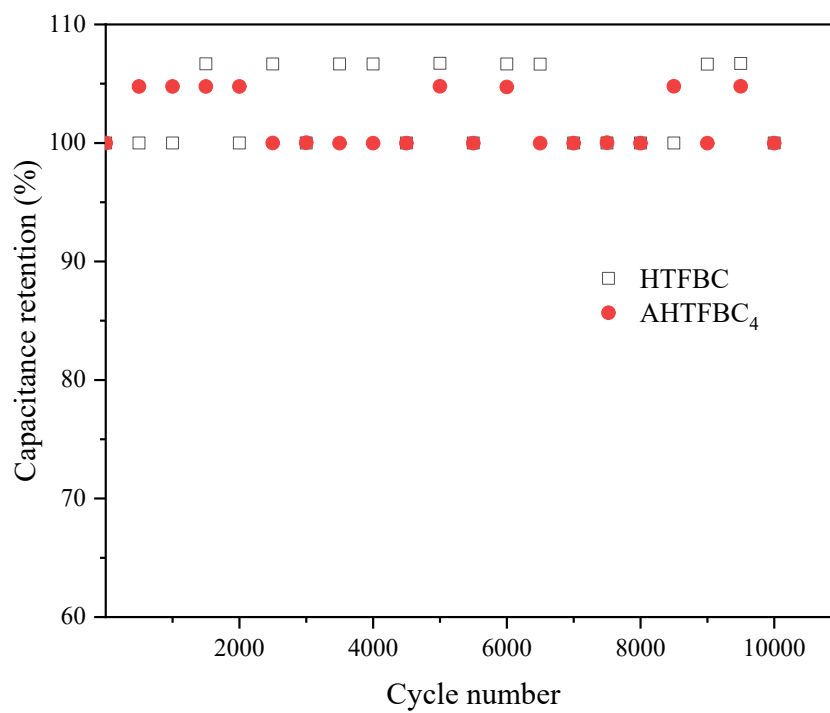

**Fig. S5** Cycling performance at 5 A/g of HTFBC and AHTFBC<sub>4</sub> measured in a three-electrode system in the 6 M KOH electrolyte

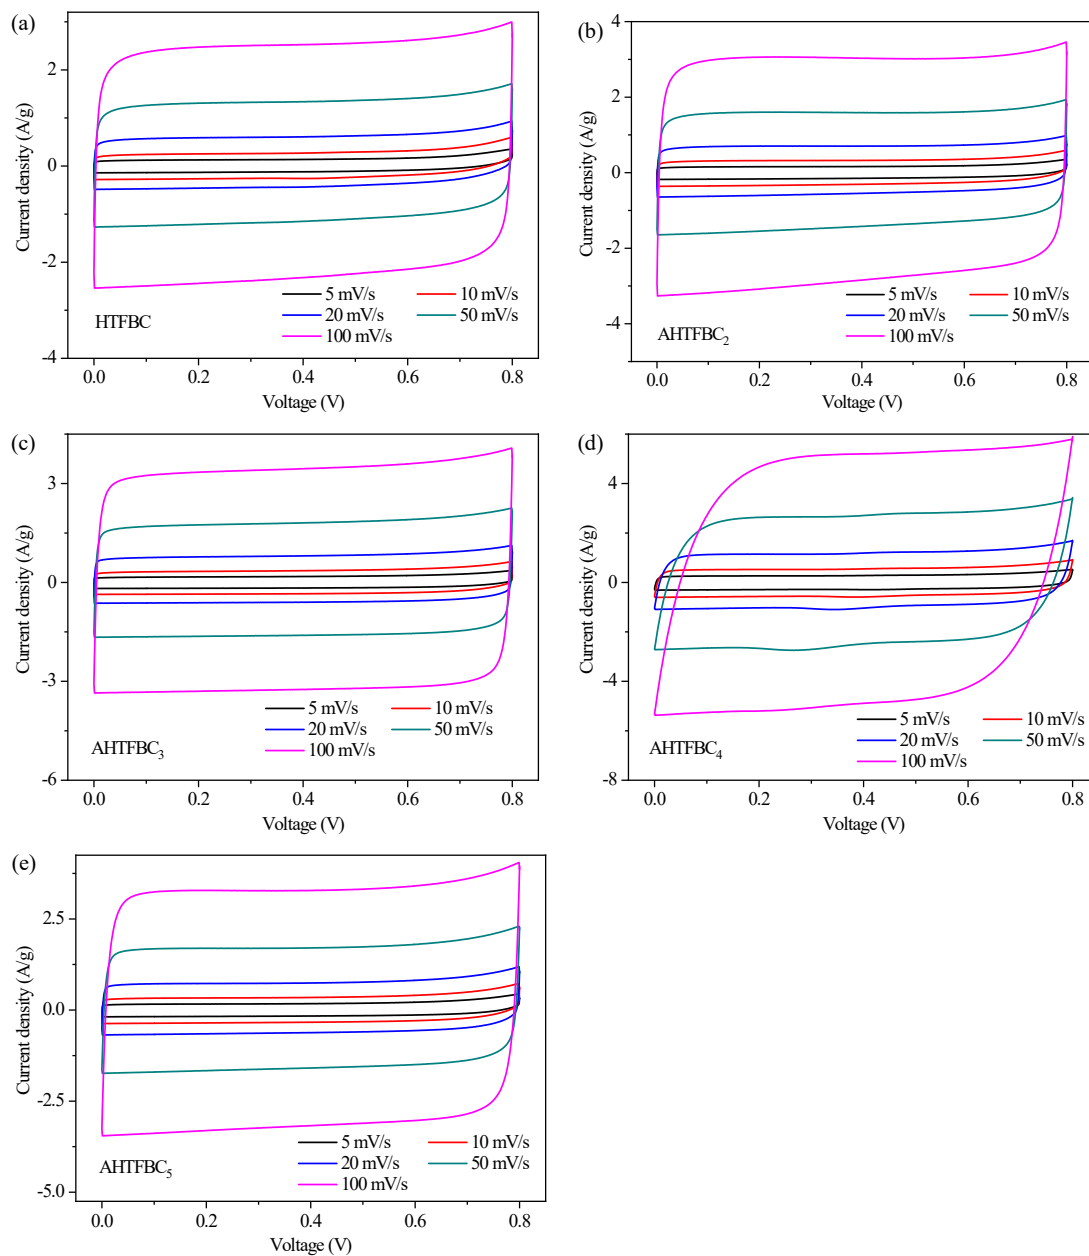

**Fig. S6** CV curves of the HTFBC and AHTFBCs measured in a two-electrode symmetrical system in the 6 M KOH electrolyte. (a) HTFBC; (b) AHTFBC<sub>2</sub>; (c) AHTFBC<sub>3</sub>; (d) AHTFBC<sub>4</sub>; (e) AHTFBC<sub>5</sub>

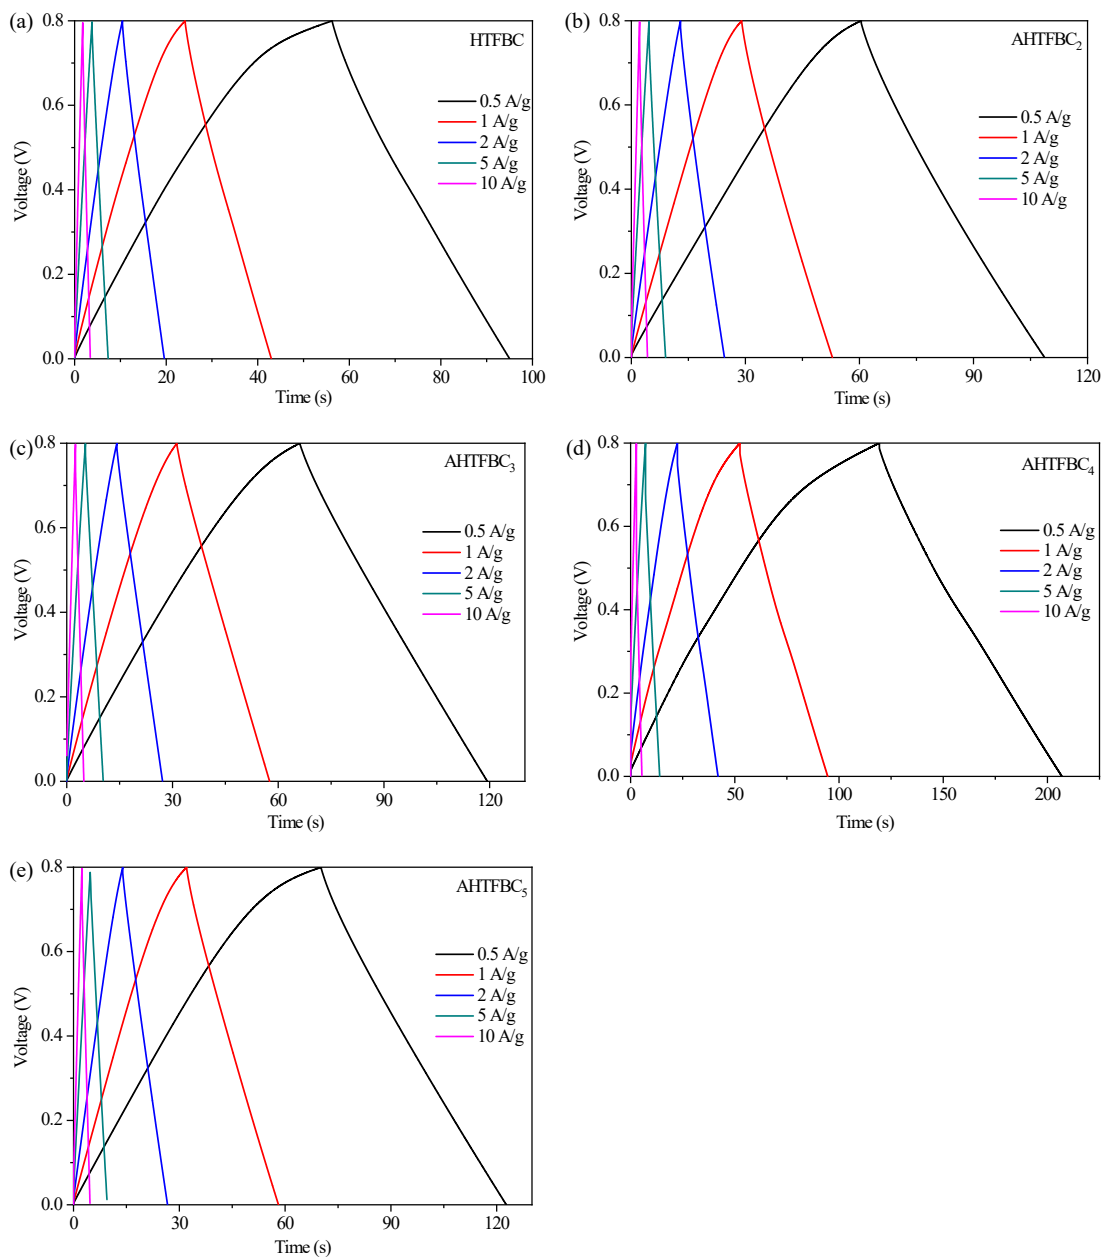

**Fig. S7** GCD curves of the HTFBC and AHTFBCs measured in a two-electrode symmetrical system in the 6 M KOH electrolyte. (a) HTFBC; (b) AHTFBC<sub>2</sub>; (c) AHTFBC<sub>3</sub>; (d) AHTFBC<sub>4</sub>; (e) AHTFBC<sub>5</sub>

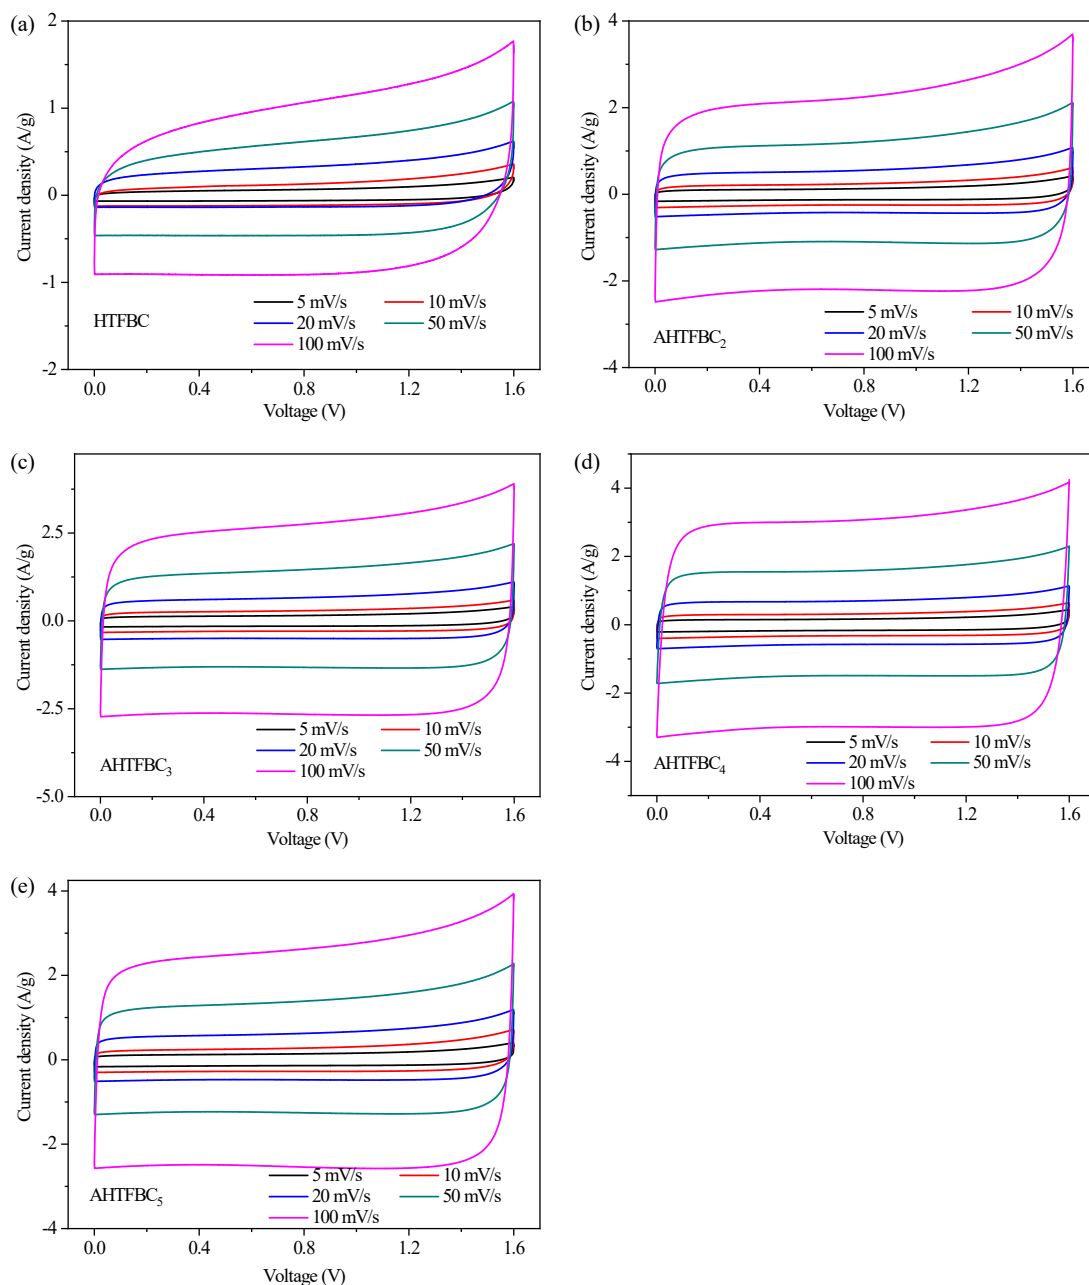

**Fig. S8** CV curves of the HTFBC and AHTFBCs measured in a two-electrode symmetrical system in the 1 M  $\text{Na}_2\text{SO}_4$  electrolyte. (a) HTFBC; (b) AHTFBC<sub>2</sub>; (c) AHTFBC<sub>3</sub>; (d) AHTFBC<sub>4</sub>; (e) AHTFBC<sub>5</sub>

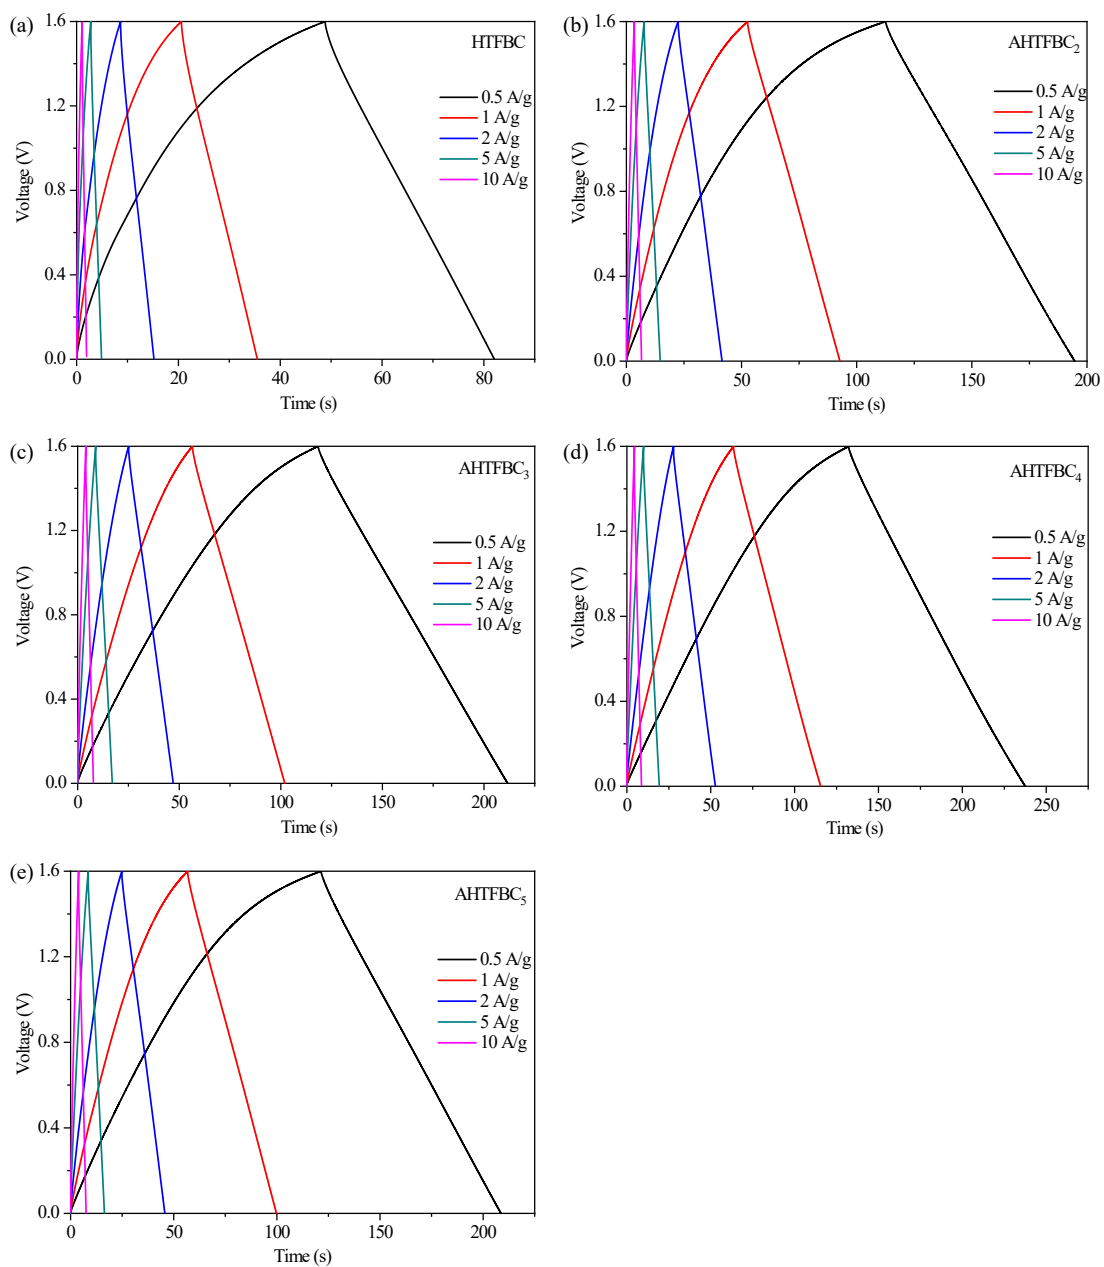

**Fig. S9** CV curves of the HTFBC and AHTFBCs measured in a two-electrode symmetrical system in the 1 M  $\text{Na}_2\text{SO}_4$  electrolyte. (a) HTFBC; (b) AHTFBC<sub>2</sub>; (c) AHTFBC<sub>3</sub>; (d) AHTFBC<sub>4</sub>; (e) AHTFBC<sub>5</sub>
